# Supplementary material for: A comparative analysis of whole genome sequencing of esophageal adenocarcinoma pre- and post-chemotherapy
Source: Genome Res. 2017 Jun;27(6):902–12. doi: 10.1101/gr.214296.116 (PMC5453324; doi:10.1101/gr.214296.116)
Supplement: Supplemental Material [file supp_gr.214296.116_Supplemental_Table_S2.xlsx]

## Sheet: .
Patient	Sample	Library	Nolanes	ReadPairs	DuplicationRate	LibrarySize	Insert	mMeanDepth	p30X	m30X	NoHeterozygousSNPsUsed	TumourProportion
007	Normal	SS6003301	5	888608322	0.062102	7246722637	353.503	57.44	95.51	95.88	1.94	0
007	Pre-chemotherapy	SS6003302	5	1013747059	0.063081	8180320210	344.209	65.07	95.36	96.85	1.94	0.69
007	Post-chemotherapy	SS6003303	5	983544916	0.066449	7412361844	333.516	62.76	97.16	97.34	1.94	0.21
010	Normal	SS6003304	5	1013028943	0.087064	5725323545	329.55	63.68	96.54	97.46	1.92	0
010	Pre-chemotherapy	SS6003305	5	963827530	0.076935	6238741245	325.689	60.45	97.02	97.34	1.92	0.38
010	Post-chemotherapy	SS6003306	5	946980915	0.121489	3675825858	351.562	56.78	95.14	95.73	1.92	0.17
011	Normal	SS6003307	5	1040312588	0.071874	7258796533	333.214	66.59	96.92	97.69	1.85	0
011	Pre-chemotherapy	SS6003308	5	984635343	0.102804	4626386806	352.194	60.93	95.23	96.87	1.85	0.24
011	Post-chemotherapy	SS6003309	5	993836487	0.059944	8499000133	358.904	63.69	97.26	97.5	1.85	0.42
006	Normal	SS6003310	6	1027827555	0.109979	4455612960	365.84	61.69	98.03	98.2	1.88	0
006	Pre-chemotherapy	SS6003311	5	866504828	0.072886	5922199199	354.067	54.52	96.61	96.83	1.88	0.42
006	Post-chemotherapy	SS6003312	5	869409697	0.046296	9802234956	338.819	56.68	95.49	96.84	1.88	0.55
002	Normal	SS6003313	5	1001511698	0.055255	9286556149	344.562	63.67	97.67	98.27	1.94	0
002	Pre-chemotherapy	SS6003314	5	994242462	0.055415	9249211833	354.596	63.78	97.17	95.95	1.94	0.74
002	Post-chemotherapy	SS6003315	5	991323661	0.068125	7299641376	348.867	62.15	95.81	96.3	1.94	0.82
001	Normal	SS6003316	5	968955423	0.062969	7822235916	334.486	62.45	94.14	97.01	1.98	0
001	Pre-chemotherapy	SS6003317	5	1036187453	0.08713	5856444618	339.321	64.24	96.14	96.05	1.98	0.5
001	Post-chemotherapy	SS6003318	5	1003111650	0.055745	9215408116	338.86	63.96	95.24	95.25	1.98	0.63
003	Normal	SS6003319	5	1045386919	0.086005	6003505567	362.74	66.04	97.23	97.6	1.91	0
003	Pre-chemotherapy	SS6003320	5	912566414	0.091192	4929193757	353.012	56.2	95.17	95.01	1.91	0.58
003	Post-chemotherapy	SS6003321	5	942798943	0.051346	9635197124	336.757	60.71	96.82	96.38	1.91	0.37
008	Normal	SS6003322	5	929514495	0.116474	3791722767	356.517	56.64	95.09	95.76	1.97	0
008	Pre-chemotherapy	SS6003323	5	887956450	0.060924	7409851848	351.679	57.07	95.4	96.52	1.97	0.41
008	Post-chemotherapy	SS6003324	5	965660660	0.055691	8911102439	369.778	62.12	96.55	96.89	1.97	0.22
005	Normal	SM-4JPUS	4	919791460	0.064951	7501449583	291.66	62.94	97.51	97.11	1.9	0
005	Pre-chemotherapy	SM-4JPUV	7	1434182817	0.087454	8381359969	318.362	98.29	99.71	99.4	1.9	0.13
005	Post-chemotherapy	SM-4JPP6	5	1146977005	0.068807	8769439988	308.59	77.86	99.31	98.94	1.9	0.51
004	Normal	LP6005333-DNA_B01	3	590539927	0.02303	16140844254	311.246	39.38	88.2	92.27	1.96	0
004	Pre-chemotherapy	SM-4JPUY	7	1321938215	0.104079	6365580581	339.852	86.76	99.31	98.68	1.96	0.56
004	Post-chemotherapy	SM-4JPPB	5	1045944786	0.071183	7647617558	317.796	68.76	99.08	98.35	1.96	0.57
012	Normal	LP2000101-DNA_A01	3	596124051	398.623	0.034337	9577505011	35.86	76.33	85.27	N/A	N/A
012	Naive	LP2000104-DNA_A01	6	1242669554	433.923	0.053879	12030864046	78.56	99.37	98.73	N/A	N/A
013	Normal	LP6005333-DNA_A02	3	558265585	312.047	0.023607	14178677408	35.66	80.58	84.36	N/A	N/A
013	Treated	LP6005334-DNA_A02	5	1173555538	299.459	0.029526	22703310825	76.39	99.31	98.99	N/A	N/A
014	Normal	LP6005333-DNA_A03	3	594520629	317.293	0.021835	16275521474	36.53	85.67	91.58	N/A	N/A
014	Naive	LP6005334-DNA_A03	5	939413050	308.13	0.032293	16262151933	60.05	96.96	97.22	N/A	N/A
015	Normal	LP6005333-DNA_B02	3	608266010	320.712	0.021255	17363955707	38.9	88.78	89.89	N/A	N/A
015	Naive	LP6005334-DNA_B02	5	982811794	302.054	0.024448	25950978807	64.51	98.39	97.51	N/A	N/A
016	Normal	LP6005333-DNA_C01	3	596215905	307.572	0.027901	12185556352	38.2	88.06	88.94	N/A	N/A
016	Treated	LP6005334-DNA_C01	5	967805758	300.207	0.024872	22824258482	61.79	98.43	97.85	N/A	N/A
017	Normal	LP6005333-DNA_C02	3	590571480	317.219	0.020046	17867454955	36.84	87.66	91.89	N/A	N/A
017	Naive	LP6005334-DNA_C02	5	968782652	306.599	0.024531	25862671417	61.57	99.12	98.47	N/A	N/A
018	Normal	LP6005333-DNA_D01	3	568046342	313.114	0.021706	15732699161	36.56	83.74	86.49	N/A	N/A
018	Treated	LP6005334-DNA_D01	5	918655889	293.665	0.024855	22222351349	59.81	98.06	97.48	N/A	N/A
019	Normal	LP6005333-DNA_D03	3	586889781	313.653	0.023574	14613876845	37.56	86.08	88	N/A	N/A
019	Treated	LP6005334-DNA_D03	5	1062940696	301.98	0.027926	21530451800	72.06	99.21	98.62	N/A	N/A
020	Normal	LP6005333-DNA_E02	3	570863292	315.2	0.020905	16373902599	36.83	84.66	86.85	N/A	N/A
020	Naive	LP6005334-DNA_E02	5	1043577140	311.786	0.024504	25902800030	67.09	98.86	98.65	N/A	N/A
021	Normal	LP6005333-DNA_F01	3	557252290	306.418	0.025749	12679300654	35.57	80.8	84.2	N/A	N/A
021	Treated	LP6005334-DNA_F01	5	1122650190	295.196	0.027552	23593975198	73.23	99.03	98.19	N/A	N/A
022	Normal	LP6005333-DNA_F02	6	678876041	305.35	0.027424	14948180299	43.79	94.21	93.14	N/A	N/A
022	Naive	LP6005334-DNA_F02	5	1014827066	312.191	0.0285	21073798011	65.86	98.09	97.48	N/A	N/A
023	Normal	LP6005333-DNA_F03	4	623242816	311.049	0.024544	15397792814	40.71	89.7	90.61	N/A	N/A
023	Naive	LP6005334-DNA_F03	5	971483231	301.984	0.028197	19951892904	62.64	98.35	97.91	N/A	N/A
024	Normal	LP6005333-DNA_G01	3	582798261	314.818	0.026569	12748651712	37.45	86.19	87.49	N/A	N/A
024	Naive	LP6005334-DNA_G01	5	1144264370	299.597	0.027936	23472204883	74.54	99.52	98.97	N/A	N/A
025	Normal	LP6005333-DNA_G02	3	597022084	309.041	0.021767	16291095204	38.44	88.21	89.17	N/A	N/A
025	Naive	LP6005334-DNA_G02	5	1069315884	306.257	0.027379	23063649673	68.87	99.01	98.38	N/A	N/A
026	Normal	LP6005333-DNA_H01	3	622059775	313.645	0.025474	14406126845	39.84	90.22	90.75	N/A	N/A
026	Naive	LP6005334-DNA_H01	5	1144016014	297.425	0.025612	26384458548	73.93	99.39	98.63	N/A	N/A
027	Normal	LP6005333-DNA_H02	3	572515552	310.024	0.022454	15212419941	36.99	85.04	86.76	N/A	N/A
027	Treated	LP6005334-DNA_H02	5	1040279034	308.635	0.04107	13791294447	65.45	98.8	98.13	N/A	N/A
028	Normal	LP6005333-DNA_H03	4	701019946	315.396	0.02651	15846988176	43.07	95.62	96.97	N/A	N/A
028	Naive	LP6005334-DNA_H03	5	1106694417	302.574	0.03229	19716485454	69.61	99.46	98.7	N/A	N/A
029	Normal	LP6005408-DNA_A01	3	563870563	328.657	0.036673	8391699061	36.06	82.31	84.51	N/A	N/A
029	Treated	LP6005409-DNA_A01	4	814938079	314.846	0.030093	15268348687	52.11	96.08	94.5	N/A	N/A
030	Normal	LP6005408-DNA_A02	3	532328606	314.392	0.025742	11856599568	33.7	73.04	79.79	N/A	N/A
030	Naive	LP6005409-DNA_A02	5	866941351	302.436	0.032917	14691348494	56.87	97.95	96.97	N/A	N/A
031	Normal	LP6005408-DNA_A03	3	542276674	307.557	0.029735	10449103935	35.36	81.52	82.36	N/A	N/A
031	Treated	LP6005409-DNA_A03	4	951110651	311.869	0.029999	18138813759	59.57	95.91	94.19	N/A	N/A
032	Normal	LP6005408-DNA_A04	3	554907522	270.556	0.028752	10889862854	35.39	80.17	83.9	N/A	N/A
032	Treated	LP6005409-DNA_A04	5	1034462964	311.05	0.033383	16990316166	66.22	98.21	97.38	N/A	N/A
033	Normal	LP6005408-DNA_B02	3	703441529	302.103	0.02871	13689868471	44.21	92.65	92.9	N/A	N/A
033	Treated	LP6005409-DNA_B02	5	884599053	293.362	0.024822	20897291408	56.28	94.82	94.13	N/A	N/A
034	Normal	LP6005408-DNA_B03	3	504597016	303.597	0.025481	11739507828	31.05	59.07	72.21	N/A	N/A
034	Treated	LP6005496-DNA_A01	5	914405085	311.111	0.031252	16350876224	60.22	96.95	95.82	N/A	N/A
035	Normal	LP6005408-DNA_B04	3	564659609	273.645	0.03286	9452722191	35.88	81.38	84.94	N/A	N/A
035	Treated	LP6005409-DNA_B04	8	1277663361	313.464	0.03904	17999465543	81.81	99.53	98.81	N/A	N/A
036	Normal	LP6005408-DNA_C01	3	593190810	318.191	0.037994	8500434413	37.76	86.82	87.66	N/A	N/A
036	Treated	LP6005409-DNA_C01	5	987204216	315.418	0.030319	18726771552	63.3	97.29	96.73	N/A	N/A
037	Normal	LP6005408-DNA_C02	3	548622689	328.859	0.024697	12676171192	34.24	79.98	85.53	N/A	N/A
037	Treated	LP6005409-DNA_C02	5	943134657	300.127	0.034787	14738975272	59.63	99.35	98.58	N/A	N/A
038	Normal	LP6005408-DNA_C04	4	621637859	361.217	0.04041	8433667391	37.39	85.98	92.13	N/A	N/A
038	Treated	LP6005409-DNA_C04	5	1091691896	317.001	0.032054	19292820189	67.16	99.24	98.51	N/A	N/A
039	Normal	LP6005408-DNA_D01	3	557135574	311.814	0.026889	11716081680	35.93	82.28	84.24	N/A	N/A
039	Treated	LP6005409-DNA_D01	5	1026542310	318.584	0.035198	16012096997	66.89	98.47	97.83	N/A	N/A
040	Normal	LP6005408-DNA_D03	3	623904422	290.357	0.038324	8933121524	37.41	80.7	88.02	N/A	N/A
040	Treated	LP6005409-DNA_D03	5	1082207788	312.116	0.03375	17804699765	68.95	98.76	98.47	N/A	N/A
041	Normal	LP6005408-DNA_E01	3	653757338	250.432	0.021625	18129155110	41.27	90.4	91.76	N/A	N/A
041	Naive	LP6005409-DNA_E01	5	943548325	320.88	0.029671	17992072878	61.22	98.36	97.52	N/A	N/A
042	Normal	LP6005408-DNA_E02	3	684516444	307.702	0.026011	15141669499	40.78	86.33	91.4	N/A	N/A
042	Naive	LP6005409-DNA_E02	5	993616470	297.088	0.036309	14862070838	64.61	98.89	98.06	N/A	N/A
043	Normal	LP6005408-DNA_E03	3	585578930	328.771	0.044728	6969979896	36.23	80.29	85.91	N/A	N/A
043	Treated	LP6005409-DNA_E03	6	955247159	315.104	0.029886	18038658769	63.39	98.37	97.91	N/A	N/A
044	Normal	LP6005408-DNA_F01	3	533515047	321.748	0.030332	9805506964	33.88	74.63	79.74	N/A	N/A
044	Naive	LP6005409-DNA_F01	5	902988649	316.178	0.037756	13124267025	57.22	97.64	96.92	N/A	N/A
045	Normal	LP6005408-DNA_F02	3	626929366	289.632	0.022157	16593014997	39.92	89.74	90.77	N/A	N/A
045	Naive	LP6005409-DNA_F02	5	902476728	299.622	0.028415	18080741534	57.71	97.66	97.08	N/A	N/A
046	Normal	LP6005408-DNA_F03	3	558789416	308.723	0.026118	12000575884	36.72	84.91	85.25	N/A	N/A
046	Naive	LP6005409-DNA_F03	5	865205425	311.564	0.034237	13665161497	57.04	97.98	97.03	N/A	N/A
047	Normal	LP6005408-DNA_G02	3	659885414	304.716	0.032529	11081169398	42.2	92.67	92.2	N/A	N/A
047	Treated	LP6005409-DNA_G02	5	1029412558	309.466	0.036106	15588082668	67.36	98.93	98.3	N/A	N/A
048	Normal	LP6005408-DNA_H01	3	609200126	306.811	0.025799	13487266390	38.72	87.17	89.18	N/A	N/A
048	Naive	LP6005409-DNA_H01	5	1058319664	289.982	0.034666	16753902164	66.98	99.23	98.5	N/A	N/A
049	Normal	LP6005408-DNA_H02	3	630330405	311.305	0.028226	12718950392	40.49	91.07	91.09	N/A	N/A
049	Treated	LP6005409-DNA_H02	5	1178328210	309.147	0.040476	15791185305	73.95	99.58	99.25	N/A	N/A
050	Normal	LP6005408-DNA_B01	3	483252464	325.288	0.023989	11765046279	30.69	59.61	67.16	N/A	N/A
050	Treated	LP6005409-DNA_B01	5	1022594812	315.211	0.034335	16278199597	67.03	98.33	97.3	N/A	N/A
051	Normal	LP6005499-DNA_A01	3	589281325	298.954	0.027255	12120965978	35.56	81.02	89.52	N/A	N/A
051	Naive	LP6005500-DNA_A01	6	1232486909	309.803	0.031615	21872133771	79	99.61	98.8	N/A	N/A
052	Normal	LP6005499-DNA_A02	3	688156347	291.751	0.022455	18134910932	43.96	93.4	92.9	N/A	N/A
052	Naive	LP6005500-DNA_A02	6	1177663502	313.183	0.031867	21268338311	74.68	99.48	98.69	N/A	N/A
053	Normal	LP6005499-DNA_A03	3	563308082	358.822	0.017681	20344052328	32.88	68.37	84.13	N/A	N/A
053	Treated	LP6005500-DNA_A03	5	905134211	309.783	0.027822	18936730649	56.73	97.48	97.35	N/A	N/A
054	Normal	LP6005499-DNA_B01	3	603503164	289.266	0.034981	9476500230	36.28	77.18	86.33	N/A	N/A
054	Naive	LP6005500-DNA_B01	5	1014474000	309.67	0.039669	13729486668	61.81	97.64	98.3	N/A	N/A
055	Normal	LP6005499-DNA_B02	3	610986147	295.617	0.026569	13098133493	39.43	89.78	89.36	N/A	N/A
055	Naive	LP6005500-DNA_B02	5	917949641	313.696	0.022472	24276583801	60.09	97.57	96.46	N/A	N/A
056	Normal	LP6005499-DNA_B03	3	566086930	310.904	0.028272	11535289647	33.23	64.92	80.17	N/A	N/A
056	Naive	LP6005500-DNA_B03	5	968978966	307.885	0.035751	14991386046	61.62	98.77	98.09	N/A	N/A
057	Normal	LP6005499-DNA_C01	3	704562524	286.613	0.034853	11261772434	41.77	87.69	92.11	N/A	N/A
057	Treated	LP6005500-DNA_C01	5	1051804808	310.062	0.038662	14989683777	67.51	99.23	98.51	N/A	N/A
058	Normal	LP6005499-DNA_C02	3	678425241	290.614	0.039297	9368441832	40.63	85.9	91.1	N/A	N/A
058	Treated	LP6005500-DNA_C02	5	1008098271	316.744	0.027883	20820496639	64.56	98.37	97.59	N/A	N/A
059	Normal	LP6005499-DNA_C03	3	619836917	317.694	0.034172	10115998342	36.87	77.95	87.22	N/A	N/A
059	Naive	LP6005500-DNA_C03	5	959795219	310.578	0.031025	17330821704	60.13	95.18	94.03	N/A	N/A
060	Normal	LP6005499-DNA_D02	3	655854083	301.676	0.027772	13619859893	38.47	80.5	89.17	N/A	N/A
060	Naive	LP6005500-DNA_D02	5	813977896	317.054	0.027838	16952532304	52.58	96.1	95.08	N/A	N/A
061	Normal	LP6005499-DNA_D03	3	676357413	321.269	0.023378	17161711650	40.65	85.96	91.26	N/A	N/A
061	Naive	LP6005500-DNA_D03	5	1018841996	313.936	0.029957	19423357073	66.24	99.26	98.38	N/A	N/A
062	Normal	LP6005499-DNA_E01	3	714693793	290.212	0.037794	10284742743	43.11	90.1	92.94	N/A	N/A
062	Treated	LP6005500-DNA_E01	5	971279314	315.232	0.028105	20017402928	62.77	97.66	96.83	N/A	N/A
063	Normal	LP6005499-DNA_E03	4	833218279	295.4	0.036737	12693727520	52.89	96.8	95.81	N/A	N/A
063	Naive	LP6005500-DNA_E03	5	1034806233	307.693	0.033166	17281191477	67.88	96.86	95.68	N/A	N/A
064	Normal	LP6005499-DNA_F01	3	657836023	292.65	0.037314	9807655975	38.85	81.71	89.28	N/A	N/A
064	Treated	LP6005500-DNA_F01	6	1194732907	314.244	0.04001	16452324337	76.74	99.34	98.69	N/A	N/A
065	Normal	LP6005499-DNA_F02	3	612571471	300.681	0.025854	13514262485	39.45	89.68	89.95	N/A	N/A
065	Naive	LP6005500-DNA_F02	5	788531816	306.595	0.029385	16328056886	51.67	97.44	96.38	N/A	N/A
066	Normal	LP6005499-DNA_F03	3	594661819	339.768	0.021243	17022018747	37.55	85.68	88.33	N/A	N/A
066	Treated	LP6005500-DNA_F03	5	998293987	319.019	0.029667	19017360956	64.89	98.5	97.64	N/A	N/A
067	Normal	LP6005499-DNA_G01	3	641887279	292.385	0.029803	12100241076	38.4	82.16	89.2	N/A	N/A
067	Naive	LP6005500-DNA_G01	5	1022072985	314.317	0.033465	16787316044	65.97	97.74	96.64	N/A	N/A
068	Normal	LP6005499-DNA_G02	3	597685311	298.275	0.030223	11510820959	35.36	72.92	84.83	N/A	N/A
068	Treated	LP6005500-DNA_G02	5	992096989	313.756	0.038087	14562963645	64.9	98.32	97.79	N/A	N/A
069	Normal	LP6005499-DNA_H03	3	592252112	319.988	0.024486	14614261954	34.11	70.57	86.67	N/A	N/A
069	Naive	LP6005500-DNA_H03	5	986152315	300.078	0.03175	18679455906	62.18	99.2	98.44	N/A	N/A
070	Normal	LP6005689-DNA_A02	4	607378061	318.012	0.029903	12210716023	37.11	79.98	85.73	N/A	N/A
070	Naive	LP6005690-DNA_A02	5	909608971	306.972	0.024099	23356499656	59.12	96.94	95.51	N/A	N/A
071	Normal	LP6005689-DNA_B01	3	706778766	316.701	0.020175	21656205815	41.23	88.95	95.3	N/A	N/A
071	Treated	LP6005690-DNA_B01	5	1075892694	313.685	0.025592	25373016755	68.57	99.43	98.65	N/A	N/A
072	Normal	LP6005689-DNA_B02	3	669595007	310.968	0.029126	13387970860	42.67	92.56	91.61	N/A	N/A
072	Naive	LP6005690-DNA_B02	5	968034520	312.104	0.026768	21874791609	64.19	98.92	98.3	N/A	N/A
073	Normal	LP6005689-DNA_C03	3	487229692	306.611	0.024095	12635870483	29.65	51.58	66.33	N/A	N/A
073	Treated	LP6005690-DNA_C03	5	1253662304	306.485	0.031532	23529138216	79.73	99.4	98.68	N/A	N/A
074	Normal	LP6005689-DNA_D01	3	655501107	316.763	0.025055	15864455119	38.02	77.68	88.2	N/A	N/A
074	Naive	LP6005690-DNA_D01	5	1155814327	314.422	0.022352	30702149917	74.53	99.07	98.28	N/A	N/A
075	Normal	LP6005689-DNA_D03	3	705080263	312.904	0.022895	18691248683	43.62	91.7	92.84	N/A	N/A
075	Treated	LP6005690-DNA_D03	5	1232549139	312.496	0.023959	31329447282	76.11	99.12	98.49	N/A	N/A
076	Normal	LP6005689-DNA_E01	3	472530839	321.355	0.019437	15394782582	28.88	47.65	62.83	N/A	N/A
076	Naive	LP6005690-DNA_E01	5	955743663	309.363	0.026861	21516669090	61.64	96.96	95.92	N/A	N/A
077	Normal	LP6005689-DNA_E02	3	663327479	316.211	0.023673	17196689115	40.07	85.84	89.98	N/A	N/A
077	Naive	LP6005690-DNA_E02	5	1125577738	308.462	0.030693	21672684145	71.99	99.1	99.03	N/A	N/A
078	Normal	LP6005689-DNA_E03	3	671741895	315.725	0.021568	19220223938	40.48	86.2	90.93	N/A	N/A
078	Treated	LP6005690-DNA_E03	5	1094398686	309.443	0.026302	24646031419	69.77	99.13	98.71	N/A	N/A
079	Normal	LP6005689-DNA_F01	3	669565344	306.022	0.022307	18027822083	39.66	89.51	94.82	N/A	N/A
079	Treated	LP6005690-DNA_F01	5	1262169782	311.565	0.025702	28830575054	80.18	99.48	98.7	N/A	N/A
080	Normal	LP6005689-DNA_F02	3	607009643	310.256	0.022993	16047438092	37.05	80.82	87.3	N/A	N/A
080	Naive	LP6005690-DNA_F02	5	1369839308	300.012	0.032166	25305799552	86.61	99.61	99.36	N/A	N/A
081	Normal	LP6005689-DNA_F03	3	727701058	310.559	0.02287	18983106198	46.17	94.33	93.87	N/A	N/A
081	Treated	LP6005690-DNA_F03	4	1000917145	309.21	0.022984	27104159118	62.98	98.04	97.4	N/A	N/A
082	Normal	LP6005689-DNA_G01	3	712879219	298.665	0.023876	17772957350	43.23	90.11	92.86	N/A	N/A
082	Treated	LP6005690-DNA_G01	5	1263305069	307.809	0.031495	23803477200	80.39	98.62	98.01	N/A	N/A
083	Normal	LP6005689-DNA_G02	3	620324842	312.127	0.022019	17437407357	36.48	75.44	86.48	N/A	N/A
083	Treated	LP6005690-DNA_G02	5	1343545443	306.096	0.029672	26522450758	85.02	99.55	99.16	N/A	N/A
084	Normal	LP6005689-DNA_H01	3	521209179	308.401	0.02806	10722309695	32.93	73.74	76.28	N/A	N/A
084	Treated	LP6005690-DNA_H01	5	1391739322	304.42	0.02958	27709353452	83.78	99.31	98.69	N/A	N/A
085	Normal	LP6005689-DNA_H02	3	676954040	303.686	0.025285	16267546333	42.74	92.41	92.34	N/A	N/A
085	Treated	LP6005690-DNA_H02	5	1131080916	305.673	0.027962	24074401186	69.67	98.93	98.28	N/A	N/A
086	Normal	LP6005777-DNA_A01	3	675500505	320.975	0.019394	21686456076	42.64	91.38	92.13	N/A	N/A
086	Naive	LP6005690-DNA_B03	5	1147803387	307.929	0.028405	26146873128	75.37	99.41	99.14	N/A	N/A
087	Normal	LP6007553-DNA_A01	3	668020829	315.757	0.04222	8537527034	41.09	87.47	91.26	N/A	N/A
087	Treated	LP6007358-DNA_A01	5	982853632	277.017	0.034	16248972984	62.07	98.87	98.77	N/A	N/A
088	Normal	LP6007393-DNA_A01	3	737311783	306.024	0.023024	18728619388	46.81	95.01	94.34	N/A	N/A
088	Treated	LP6007394-DNA_A01	5	1104022198	298.46	0.029924	20814152514	70.87	99.17	98.69	N/A	N/A
089	Normal	LP6007395-DNA_A01	3	656966697	308.301	0.022911	16798798308	40.74	94.19	95.91	N/A	N/A
089	Treated	LP6007396-DNA_A01	4	890098925	304.599	0.026568	19250031988	56.23	96.43	95.55	N/A	N/A
090	Normal	LP6007397-DNA_A01	3	672155507	308.738	0.022165	18016181645	42.41	92.75	92.55	N/A	N/A
090	Treated	LP6007398-DNA_A01	5	1229839988	304.028	0.025619	27931649890	77.72	98.71	97.78	N/A	N/A
091	Normal	LP6007400-DNA_A01	3	631595623	291.218	0.033956	10206735700	40.3	90.61	90.97	N/A	N/A
091	Naive	LP6007401-DNA_A01	5	970215229	310.014	0.025011	22550261180	63.41	98.58	97.7	N/A	N/A
092	Normal	LP6007406-DNA_A01	3	623286708	289.148	0.023537	15995343123	39.12	87.65	90.04	N/A	N/A
092	Treated	LP6007407-DNA_A01	5	1009254837	313.892	0.024585	24112259900	63.58	98.69	97.84	N/A	N/A
093	Normal	LP6007408-DNA_A01	3	503061900	299.68	0.030237	9546756520	31.95	66.17	73.1	N/A	N/A
093	Treated	LP6007409-DNA_A01	5	1005902785	301.189	0.028584	20411337634	64.1	98.46	97.72	N/A	N/A
094	Normal	LP6007417-DNA_A02	3	500667697	334.783	0.02017	15184169311	32.31	61.44	71.75	N/A	N/A
094	Treated	LP6007418-DNA_A02	5	1015427343	306.01	0.028314	21773392720	68.86	99.2	98.71	N/A	N/A
095	Normal	LP6007419-DNA_A01	3	516820983	312.701	0.017801	17741716076	31.64	65.83	77.76	N/A	N/A
095	Naive	LP6007420-DNA_A01	5	993647299	305.664	0.025022	24076528603	62.71	99.3	98.59	N/A	N/A
096	Normal	LP6007421-DNA_A01	3	497137272	292.573	0.024705	11576225443	31.03	59.73	70.78	N/A	N/A
096	Naive	LP6007422-DNA_A01	5	1064763665	303.048	0.028585	21581085511	69.04	98.62	97.77	N/A	N/A
097	Normal	LP6007423-DNA_A01	3	509177308	292.554	0.021216	14227926599	31.71	62.08	73.59	N/A	N/A
097	Naive	LP6007424-DNA_A01	5	915816776	307.763	0.023659	24207815970	59.96	93.36	92.55	N/A	N/A
098	Normal	LP6007429-DNA_A01	3	563868175	343.872	0.023919	14075821980	36.07	81.81	84.97	N/A	N/A
098	Naive	LP6007430-DNA_A01	5	975745677	304.909	0.024826	23314505035	64.21	98.83	97.99	N/A	N/A
099	Normal	LP6007431-DNA_A01	3	508764222	321.01	0.025541	11654826886	32.49	68.35	74.74	N/A	N/A
099	Treated	LP6007432-DNA_A01	7	1541790669	304.734	0.025258	36645532445	99.45	99.75	99.13	N/A	N/A
100	Normal	LP6007433-DNA_A01	3	634764017	311.171	0.0234	16136286930	40.18	89.26	90.7	N/A	N/A
100	Treated	LP6007434-DNA_A01	5	1268388876	330.863	0.034753	20599712548	80.82	99.55	98.92	N/A	N/A
101	Normal	LP6007439-DNA_A01	3	516086967	321.636	0.022595	13339238296	32.57	67.86	75.86	N/A	N/A
101	Treated	LP6007440-DNA_A01	6	1171210017	308.516	0.028691	23637031381	74.1	99.52	99.15	N/A	N/A
102	Normal	LP6007441-DNA_A01	3	561501348	323.79	0.023972	13601330889	35.17	76.58	83.1	N/A	N/A
102	Naive	LP6007442-DNA_A01	5	941723819	307.335	0.030161	18450419032	62.52	99.04	98.43	N/A	N/A
103	Normal	LP6007505-DNA_A01	3	724214093	310.873	0.025974	16444081160	43.45	91.82	92.4	N/A	N/A
103	Treated	LP6007506-DNA_A01	5	964538472	289.387	0.027029	22424658002	61.36	93.49	97.42	N/A	N/A
104	Normal	LP6007507-DNA_A01	3	693969567	314.269	0.025873	15745861812	45.17	94.89	93.33	N/A	N/A
104	Treated	LP6007508-DNA_A01	5	944851701	280.543	0.024847	22602592637	59.46	97.78	97.06	N/A	N/A
105	Normal	LP6007513-DNA_A01	3	685587434	313.437	0.02386	17069743818	44.36	94.16	93.11	N/A	N/A
105	Treated	LP6007514-DNA_A01	4	806905345	283.919	0.029175	15870288198	52.37	96.69	95.65	N/A	N/A
106	Normal	LP6007517-DNA_A01	3	633215530	323.849	0.025316	15518297683	41.54	92.06	91.04	N/A	N/A
106	Treated	LP6007518-DNA_A01	5	956749280	294.359	0.024356	23593093416	60.74	98.4	98.15	N/A	N/A
107	Normal	LP6007519-DNA_A01	3	749158811	299.085	0.02812	17010398346	46.24	89.4	94.01	N/A	N/A
107	Naive	LP6007520-DNA_A01	5	898249921	317.733	0.023787	22306569216	56.38	94.95	95.59	N/A	N/A
108	Normal	LP6007534-DNA_A01	3	618115124	320.716	0.020891	18311376368	37.22	87.04	91.8	N/A	N/A
108	Treated	LP6007535-DNA_A01	6	1067062351	310.602	0.02926	21317641421	66.99	99.18	98.57	N/A	N/A
109	Normal	LP6007539-DNA_A01	2	515124515	316.665	0.030667	9208039088	32.42	67.26	75.21	N/A	N/A
109	Naive	LP6007540-DNA_A01	4	786193384	279.618	0.022719	20325684221	49.78	94.14	94.18	N/A	N/A
110	Normal	LP6007541-DNA_A01	3	650639824	317.696	0.029627	12382527530	38.68	83.79	89.2	N/A	N/A
110	Naive	LP6007542-DNA_A01	5	928886121	306.094	0.025651	20906089490	60.14	97.68	98.01	N/A	N/A
111	Normal	LP6007547-DNA_A01	3	600380640	309.122	0.0366	8829110784	37.05	79.37	86.14	N/A	N/A
111	Treated	LP6007548-DNA_A01	5	983579799	318.722	0.024759	23918232433	62.32	97.9	98	N/A	N/A
112	Normal	LP6007549-DNA_A01	4	639371265	314.791	0.029715	12265660830	37.52	73.67	87.85	N/A	N/A
112	Treated	LP6007550-DNA_A01	5	817537234	317.19	0.022257	22504562816	52.66	93.41	93.62	N/A	N/A
113	Normal	LP6007551-DNA_A01	3	706420003	326.699	0.042371	8978592745	43.72	89.95	92.56	N/A	N/A
113	Treated	LP6007552-DNA_A01	5	1087465064	309.889	0.026109	24296050531	70.1	97.63	98.73	N/A	N/A
114	Normal	LP6007566-DNA_A01	3	603854770	333.923	0.022555	15996945915	37.26	81.42	88.18	N/A	N/A
114	Naive	LP6007504-DNA_A01	5	1048207648	291.553	0.025439	23577814743	66.76	99.23	98.92	N/A	N/A
115	Normal	LP6007568-DNA_A01	3	611651502	326.922	0.031441	11059278581	38.01	83.62	88.53	N/A	N/A
115	Treated	LP6007546-DNA_A01	5	945634889	306.968	0.029152	18741593164	59.5	96.89	97.31	N/A	N/A
116	Normal	LP6007590	3	566329973	320.327	0.038941	7806599400	36.26	82.9	84.93	N/A	N/A
116	Naive	LP6007591	6	1192635383	299.115	0.056318	11059572830	77.29	99.53	98.76	N/A	N/A
117	Normal	LP6007593	3	593010964	304.706	0.046807	6646313356	37.61	85.84	87.78	N/A	N/A
117	Naive	LP6007594	6	1199094319	314.781	0.060625	10144674496	77.41	99.39	98.65	N/A	N/A
118	Normal	LP6007599	3	509079783	322.623	0.035066	8006637965	32.24	67	74.51	N/A	N/A
118	Naive	LP6007600	6	1183369942	314.46	0.060625	10148765832	75.8	99.39	99.23	N/A	N/A
119	Normal	LP6007601	3	594041411	307.834	0.036521	8894484897	37.71	84.94	87.67	N/A	N/A
119	Naive	LP6007602	6	1287377126	290.273	0.061466	10800795169	83.36	99.52	99.27	N/A	N/A
120	Normal	SM-4AWN8	5	608482853	299.287	0.050148	6453473286	41.54	91.5	88.48	N/A	N/A
120	Naive	SM-4AX82	12	1147180997	337.941	0.078964	7452630769	77.76	98.62	98.37	N/A	N/A
121	Normal	SM-4AWN9	6	663779423	318.242	0.045153	8039315359	46.46	94.38	91.41	N/A	N/A
121	Treated	SM-4AX83	13	1086291914	315.719	0.076353	7221575968	77.6	99.12	98.19	N/A	N/A
122	Normal	SM-4AWNA	4	545680029	311.244	0.040781	7343641618	38.44	87.05	81.2	N/A	N/A
122	Naive	SM-4AX84	10	1195841656	330.974	0.076254	8036011024	83.97	99.31	98.96	N/A	N/A
123	Normal	SM-4AWNC	8	686470025	352.089	0.102232	3257873294	47.57	94.08	91.07	N/A	N/A
123	Naive	SM-4AX86	13	1317248178	347.108	0.087912	7513142236	94	99.59	99.19	N/A	N/A
124	Normal	SM-4AWND	5	561023429	279.805	0.043059	7410162608	35.85	78.9	81.97	N/A	N/A
124	Naive	SM-4AX87	12	1412271845	326.855	0.08289	8640093360	93.61	99.35	99.4	N/A	N/A
125	Normal	SS6003108	6	1154863455	303.594	0.066027	9019896922	77.33	98.02	98.06	N/A	N/A
125	Naive	SS6003109	5	982336559	296.464	0.113958	4071191905	56.56	96.86	97.64	N/A	N/A
126	Normal	SS6003110	6	1159162680	310.2	0.083931	6993468181	75.45	97.45	97.85	N/A	N/A
126	Naive	SS6003111	5	988596127	295.774	0.108528	4332725164	56.76	95.5	96.25	N/A	N/A
127	Normal	SS6003114	5	881357870	316.722	0.056679	8307215312	63.03	95.71	94.04	N/A	N/A
127	Naive	SS6003115	5	934849534	293.891	0.137628	3170298169	54.6	92.6	91.65	N/A	N/A
128	Normal	SS6003116	5	870561000	301.872	0.127528	3535541093	52.98	94.28	94.83	N/A	N/A
128	Naive	SS6003117	5	922314072	309.198	0.073862	6302277201	60.01	96.31	96.52	N/A	N/A
129	Normal	SS6003118	6	1161842719	282.848	0.1495	3612935663	65.72	97	98.02	N/A	N/A
129	Naive	SS6003119	5	938659527	308.644	0.042829	11524408072	66.49	94.93	94.71	N/A	N/A
130	Normal	SS6003120	5	1111613500	326.297	0.043775	13525996351	81.6	97.28	97.43	N/A	N/A
130	Naive	SS6003121	5	1092884016	330.483	0.051119	11220447242	78.87	97.16	97.15	N/A	N/A
131	Normal	SS6003148	5	1027533361	329.386	0.041161	13493568697	73.19	97.63	97.5	N/A	N/A
131	Naive	SS6003149	5	1022288116	309.936	0.051842	10447785143	73.68	94.81	91.97	N/A	N/A
